# Supplementary material for: Assembly of a Benthic Microbial Community in a Eutrophic Bay with a Long History of Oyster Culturing
Source: MDPI journal article supplement (doi:10.3390/microorganisms9102019), 2021-09-24
Supplement: s1 [file s1]

## Supplementary Materials

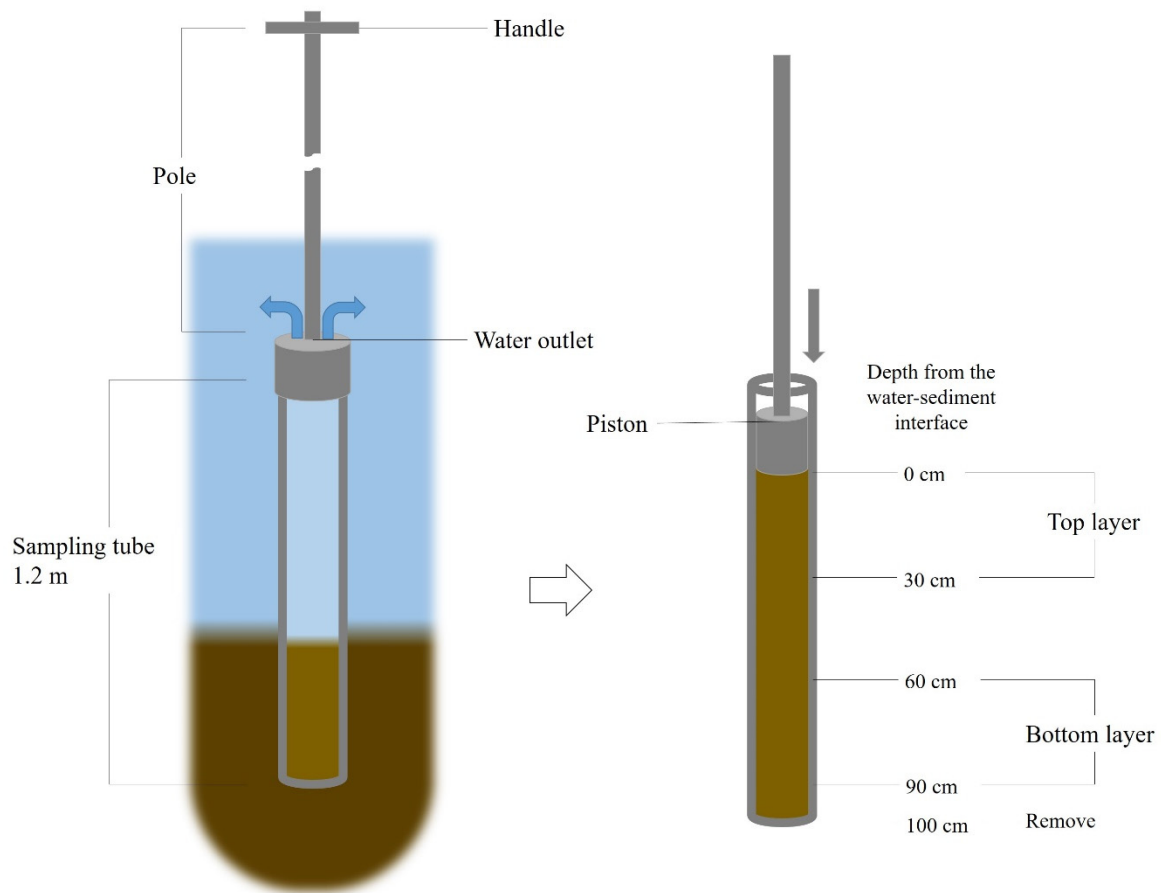

**Figure S1. Schematic view of the sampling device (left) and the sediment core (right).** Sediment sample showed in brown and water in light blue. A handle and a pole were used to push down the sampling tube into the sediment and lift it out. The bottom 10 cm or more of each core was removed as it exposed in air too long. The rest of the sediment was divided for the top layer and the bottom layer samples as depicted.

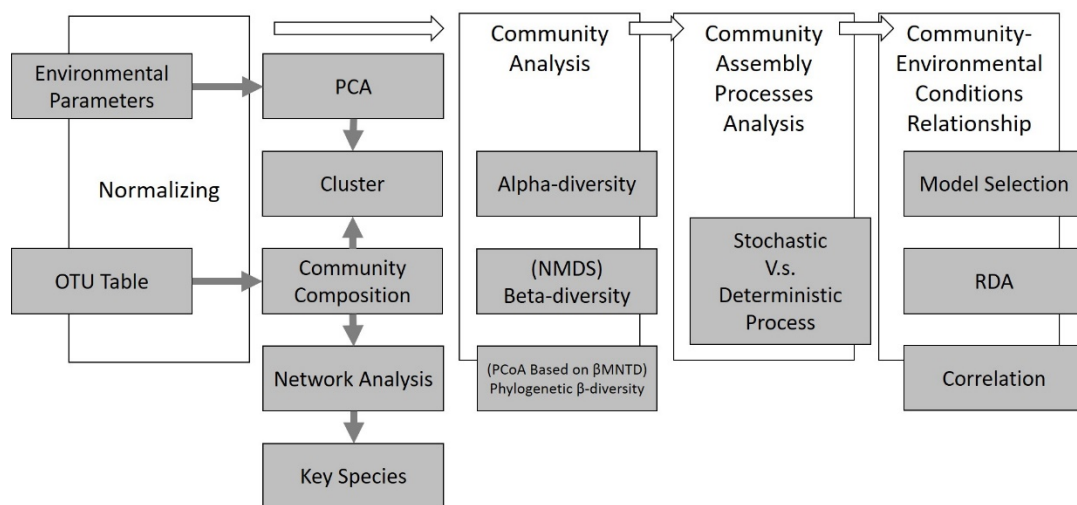

**Figure S2. Work flow of main analysis methods.**

**Table S1. Environmental parameters.**

| Sample | pH    | ORP    | moisture | NH <sub>4</sub> <sup>+</sup> (mg*kg <sup>-1</sup> )-N | TN%    | TOC%   |
|--------|-------|--------|----------|-------------------------------------------------------|--------|--------|
| TO1    | 7.463 | -247.5 | 0.66     | 3.2935                                                | 0.2242 | 1.8543 |
| TO2    | 7.663 | -249.5 | 0.62     | 1.7845                                                | 0.1717 | 1.2695 |
| TO3    | 7.520 | -198.6 | 0.62     | 1.9715                                                | 0.2242 | 1.6879 |
| TO4    | 7.423 | -239.7 | 0.64     | 0.992                                                 | 0.2290 | 1.6879 |
| TO5    | 7.123 | -269   | 0.58     | 0.76                                                  | 0.2099 | 1.5976 |
| TO6    | 7.397 | -272.4 | 0.63     | 3.078                                                 | 0.2385 | 1.7449 |
| TO7    | 7.640 | -270.8 | 0.62     | 2.8865                                                | 0.2337 | 1.8495 |
| TO8    | 7.357 | -280.4 | 0.59     | 0.929                                                 | 0.1813 | 1.5262 |
| BO1    | 7.983 | -70.9  | 0.45     | 1.254                                                 | 0.1336 | 1.4074 |
| BO2    | 7.737 | -113.6 | 0.42     | 0.6195                                                | 0.1288 | 0.9604 |
| BO3    | 7.757 | -70.1  | 0.43     | 0.492                                                 | 0.1526 | 1.1221 |
| BO4    | 7.813 | -226.2 | 0.38     | 0.4085                                                | 0.1336 | 1.0318 |
| BO5    | 7.333 | -160.6 | 0.42     | 0.357                                                 | 0.1240 | 0.8368 |
| BO6    | 7.837 | -53.8  | 0.42     | 0.719                                                 | 0.1193 | 0.8558 |
| BO7    | 7.727 | -151.3 | 0.45     | 1.009                                                 | 0.1288 | 1.0318 |
| BO8    | 7.613 | -140.7 | 0.41     | 0.2375                                                | 0.1002 | 0.7798 |
| TN1    | 7.427 | -131.6 | 0.55     | 0.5005                                                | 0.1431 | 0.9747 |
| TN2    | 7.167 | -107.2 | 0.49     | 0.3365                                                | 0.1526 | 1.3028 |
| TN3    | 7.470 | -155   | 0.41     | 0.2835                                                | 0.1622 | 1.4739 |
| TN4    | 7.310 | -243.9 | 0.52     | 0.514                                                 | 0.2147 | 1.8020 |
| TN5    | 7.717 | -178   | 0.54     | 0.3385                                                | 0.1622 | 1.2267 |
| TN6    | 7.497 | -215.5 | 0.54     | 0.5605                                                | 0.1717 | 1.2695 |
| TN7    | 7.480 | -273.9 | 0.56     | 0.28                                                  | 0.1670 | 1.2457 |
| TN8    | 7.413 | -166.5 | 0.50     | 0.4085                                                | 0.1383 | 1.2219 |
| BN1    | 7.673 | -140.5 | 0.40     | 0.623                                                 | 0.0954 | 0.6704 |
| BN2    | 7.667 | -198.5 | 0.51     | 0.94                                                  | 0.1336 | 0.9509 |
| BN3    | 7.667 | -232.4 | 0.52     | 0.4865                                                | 0.1622 | 1.1506 |
| BN4    | 7.747 | -234.1 | 0.51     | 0.85                                                  | 0.1622 | 1.2077 |
| BN5    | 7.910 | -182.6 | 0.52     | 0.4985                                                | 0.1574 | 1.0175 |
| BN6    | 7.560 | -171.3 | 0.51     | 1.2815                                                | 0.1336 | 0.9034 |
| BN7    | 7.497 | -195   | 0.51     | 1.5075                                                | 0.1336 | 0.8273 |
| BN8    | 7.600 | -114.9 | 0.51     | 1.1605                                                | 0.1574 | 1.3028 |

**Table S2. Correlation of environmental indexes of sediments across all groups.** Red: positively related; blue: negatively related; star: significantly related. (n=32, \*: p<0.1, \*\*: p<0.05, \*\*\*: p<0.01)

|                              | ORP     | moisture   | NH <sub>4</sub> <sup>+</sup> | TN         | TOC       |
|------------------------------|---------|------------|------------------------------|------------|-----------|
| pH                           | 0.388 * | -0.386 *   | -0.034                       | -0.414 *   | -0.389 *  |
| ORP                          |         | -0.687 *** | -0.382 *                     | -0.666 *** | -0.54 **  |
| moisture                     |         |            | 0.647 ***                    | 0.835 ***  | 0.71 ***  |
| NH <sub>4</sub> <sup>+</sup> |         |            |                              | 0.608 ***  | 0.557 *** |
| TN                           |         |            |                              |            | 0.931 *** |

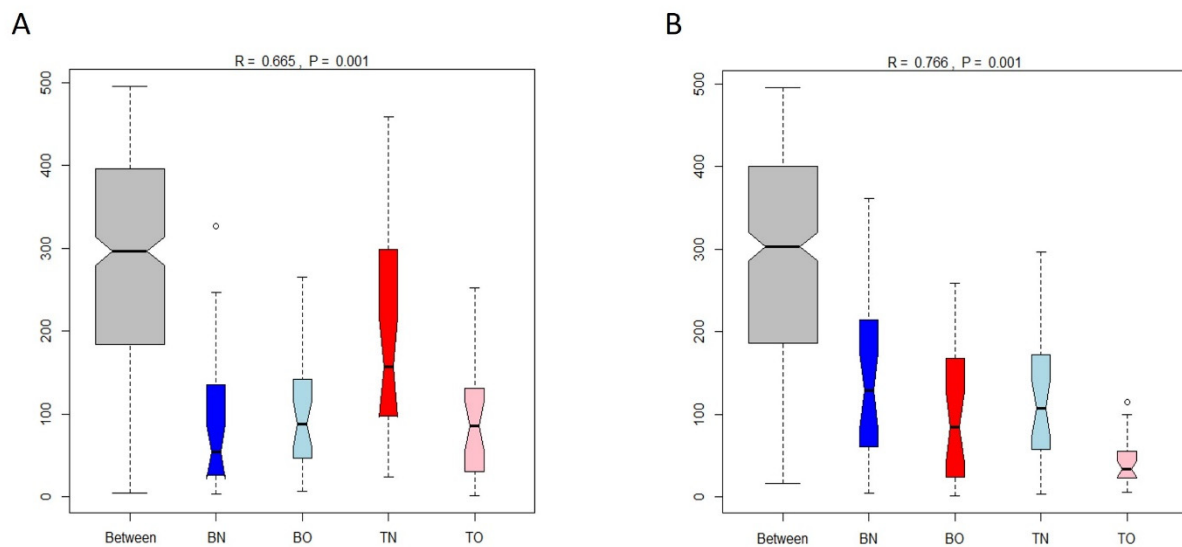

**Figure S3. ANOSIM analysis of environmental parameters and species abundance of four groups of samples.** (A) Environmental parameters; (B) species. Differences between, gray, and within groups (top layer of oyster-culture site, TO, pink, bottom layer of oyster-culture site, BO, red, top layer of non-culture site, TN, light blue, and bottom layer of non-culture site, BN, blue). The same colorings were adopted in figures below when refer to sample groups. (n=8,  $p < 0.05$ . Error bar, mean  $\pm$  s.d.)

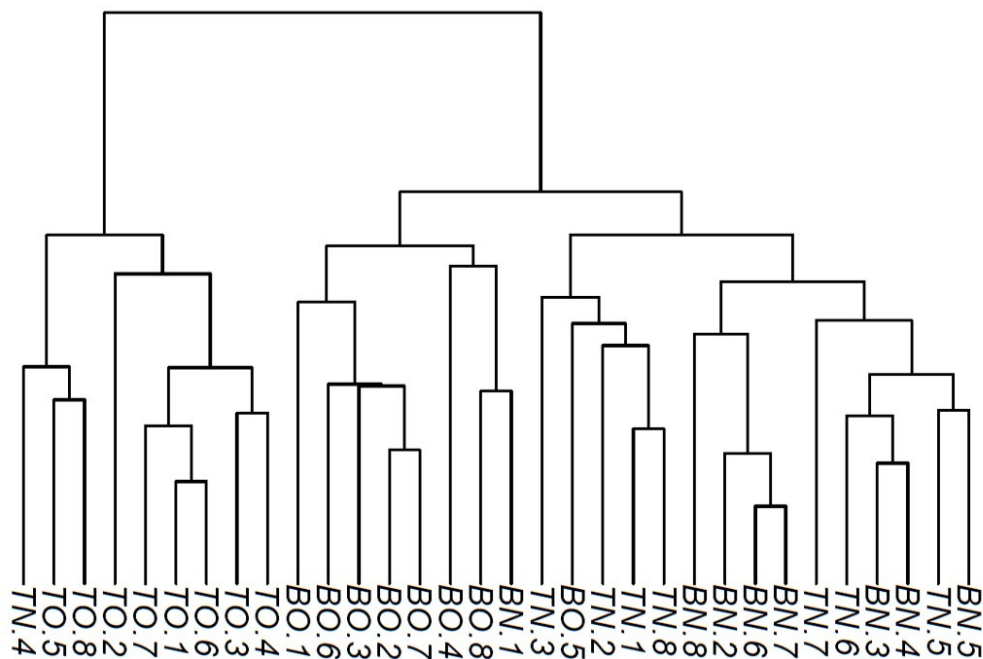

**Figure S4. Cluster based on environmental parameters.**

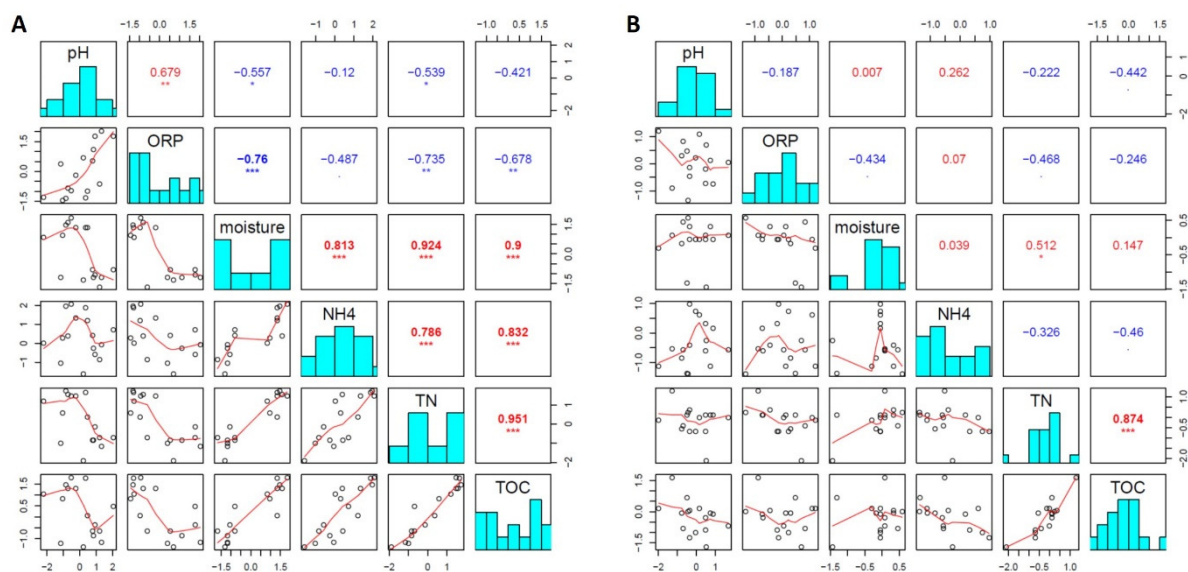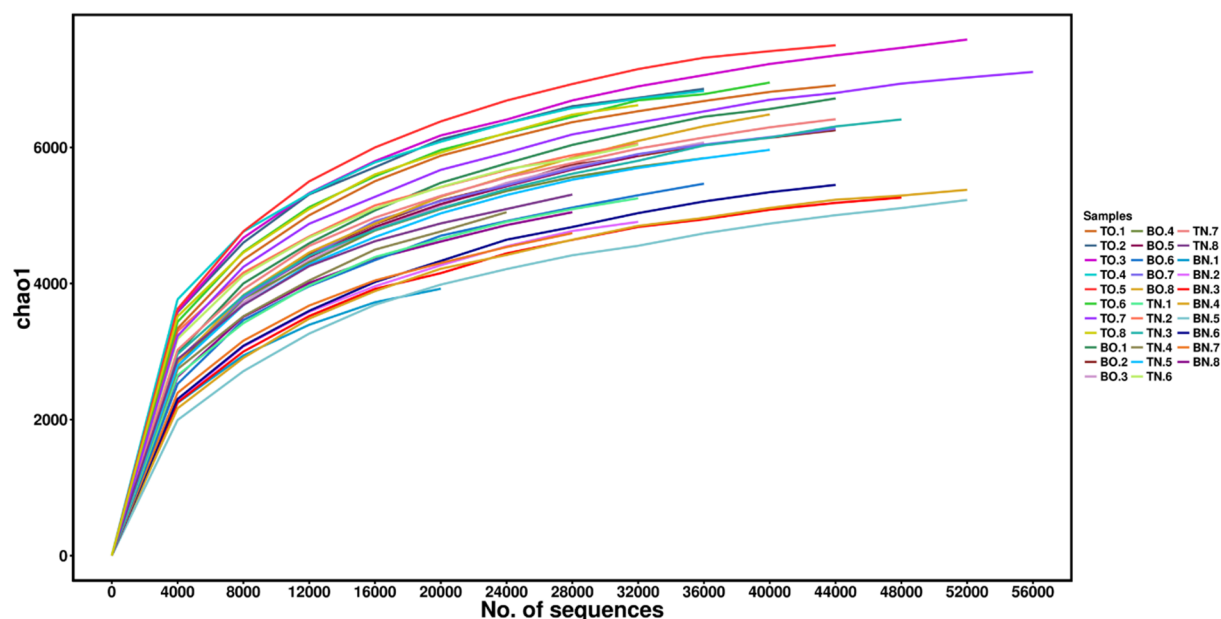

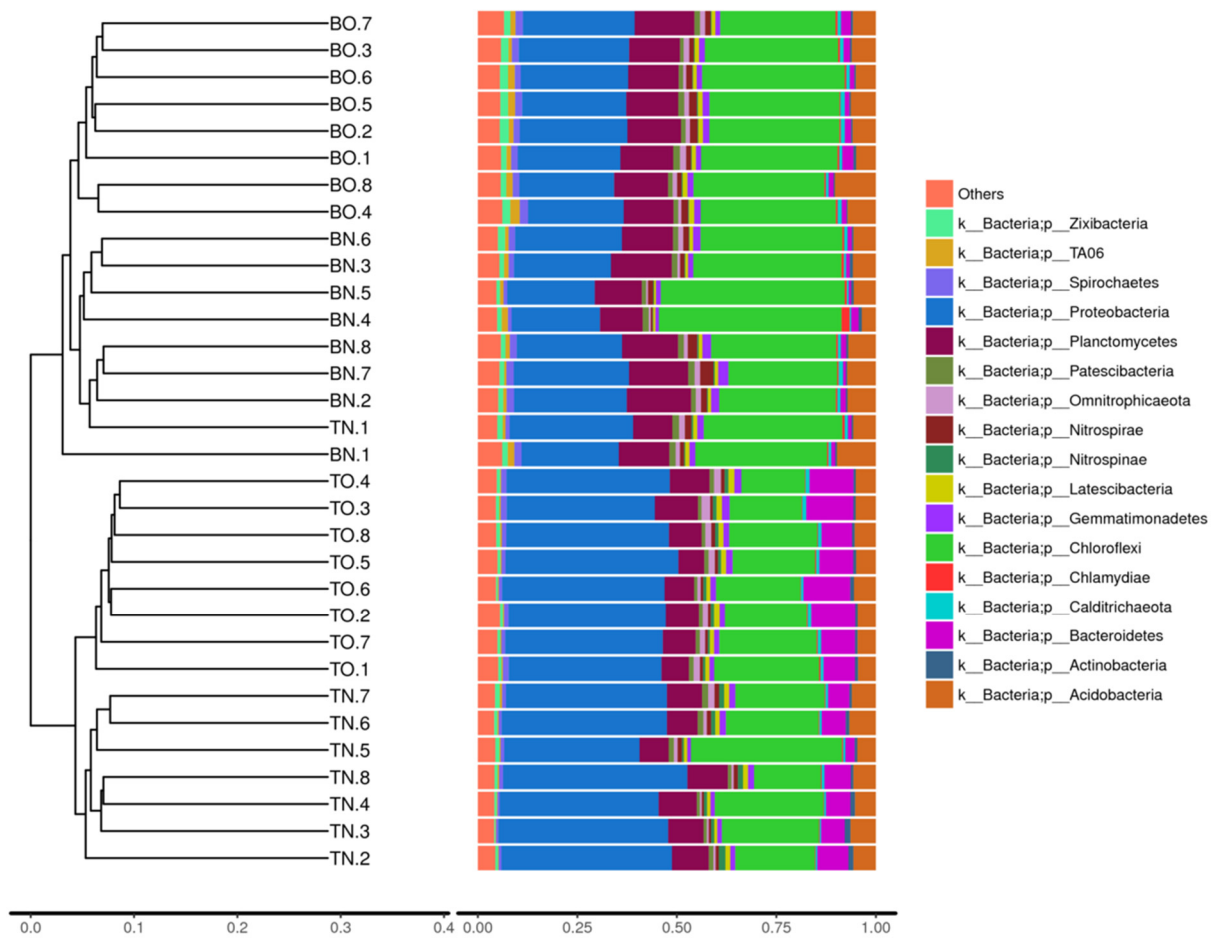

**Figure S7. Relative abundance (right) and cluster (left) of microbial communities of samples.**

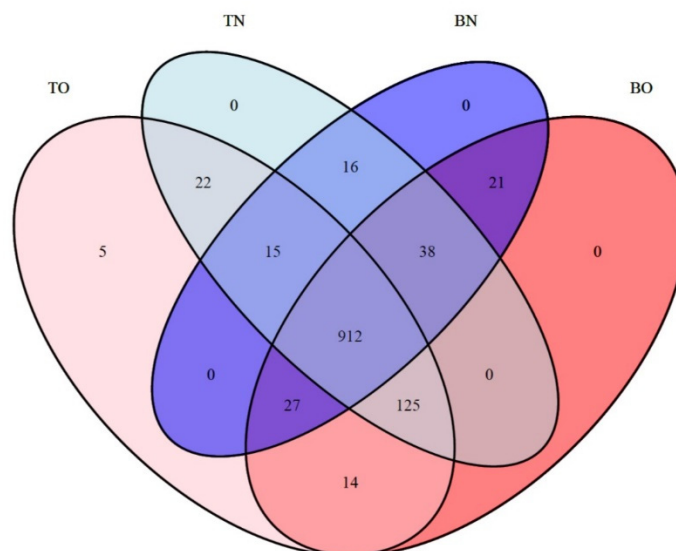

**Figure S8. Venn diagram.** A given species was “present” in a group when it was present in at least 4 out of 8 samples of the group. Numbers in overlapping areas were numbers of shared species, other wise the numbers stand for group specific species in according group.

**Table S3.  $\beta$ NTI of the microbial community.**

|      | BO.1 | TO.2  | BO.2 | TO.3 | BO.3 | TO.4 | BO.4  | TO.5 | BO.5 | TO.6 | BO.6 | TO.7  | BO.7 | TO.8  | BO.8  | TN.1 | BN.1 | TN.2 | BN.2 | TN.3 | BN.3 | TN.4 | BN.4 | TN.5 | BN.5 | TN.6 | BN.6 | TN.7 | BN.7 | TN.8 | BN.8 |
|------|------|-------|------|------|------|------|-------|------|------|------|------|-------|------|-------|-------|------|------|------|------|------|------|------|------|------|------|------|------|------|------|------|------|
| TO.1 | 1.71 | -0.25 | 3.77 | 0.31 | 0.38 | 1.90 | 2.91  | 0.59 | 1.68 | 2.92 | 2.73 | 0.17  | 1.63 | -0.18 | 2.77  | 2.61 | 2.74 | 1.30 | 1.52 | 1.89 | 2.80 | 2.36 | 3.40 | 2.17 | 2.49 | 1.74 | 2.50 | 1.64 | 1.43 | 2.41 | 2.54 |
| BO.1 |      | 2.55  | 2.51 | 2.08 | 2.27 | 3.71 | 1.13  | 1.81 | 3.22 | 4.57 | 3.17 | 0.72  | 2.42 | 0.98  | 1.71  | 2.97 | 2.84 | 1.89 | 3.01 | 1.93 | 2.63 | 2.18 | 1.50 | 1.38 | 1.90 | 1.62 | 1.69 | 1.68 | 3.02 | 2.16 | 2.06 |
| TO.2 |      |       | 3.59 | 0.75 | 2.26 | 1.62 | 2.18  | 1.46 | 2.27 | 3.47 | 2.69 | 1.60  | 3.30 | 1.80  | 0.77  | 2.86 | 2.21 | 1.36 | 2.68 | 1.25 | 3.40 | 1.48 | 2.84 | 1.40 | 2.57 | 1.39 | 3.13 | 1.60 | 2.43 | 1.72 | 2.60 |
| BO.2 |      |       |      | 3.51 | 2.41 | 5.87 | 1.34  | 4.86 | 1.49 | 4.57 | 3.24 | 1.62  | 2.41 | 2.41  | 0.04  | 2.41 | 2.77 | 3.49 | 1.90 | 2.89 | 2.77 | 2.41 | 2.84 | 2.96 | 2.05 | 2.61 | 2.03 | 2.09 | 2.63 | 2.50 | 2.94 |
| TO.3 |      |       |      |      | 1.91 | 1.52 | 0.83  | 1.67 | 1.59 | 3.33 | 2.84 | 0.18  | 4.02 | -0.79 | 0.29  | 3.68 | 1.69 | 1.91 | 3.75 | 1.58 | 4.15 | 2.00 | 3.83 | 2.47 | 3.25 | 1.88 | 3.31 | 1.63 | 2.76 | 2.02 | 2.68 |
| BO.3 |      |       |      |      |      | 4.14 | -0.05 | 2.20 | 2.52 | 2.58 | 1.79 | 0.67  | 1.95 | 0.20  | 1.31  | 2.08 | 2.09 | 2.32 | 2.00 | 1.78 | 1.82 | 1.96 | 2.18 | 2.36 | 1.97 | 2.10 | 1.99 | 1.67 | 2.45 | 1.48 | 2.10 |
| TO.4 |      |       |      |      |      |      | 2.20  | 2.23 | 3.07 | 3.01 | 3.53 | 2.12  | 6.29 | 3.86  | 1.37  | 3.93 | 1.98 | 1.41 | 3.58 | 1.18 | 4.65 | 1.52 | 3.99 | 1.74 | 3.31 | 1.67 | 4.24 | 1.60 | 3.58 | 1.83 | 3.22 |
| BO.4 |      |       |      |      |      |      |       | 1.81 | 1.45 | 1.54 | 0.69 | -0.01 | 0.33 | 1.73  | 1.49  | 1.35 | 1.71 | 1.94 | 1.41 | 1.62 | 1.11 | 1.52 | 1.73 | 2.05 | 1.06 | 1.88 | 0.95 | 1.38 | 1.51 | 0.97 | 1.36 |
| TO.5 |      |       |      |      |      |      |       |      | 1.58 | 3.13 | 2.18 | 0.77  | 2.28 | 1.17  | 0.89  | 2.59 | 2.24 | 1.35 | 2.27 | 1.35 | 2.94 | 1.50 | 2.74 | 1.29 | 2.35 | 1.51 | 2.77 | 1.60 | 2.19 | 1.66 | 2.49 |
| BO.5 |      |       |      |      |      |      |       |      |      | 1.31 | 1.23 | -0.06 | 0.10 | 1.54  | -0.04 | 2.29 | 2.40 | 2.63 | 1.86 | 2.20 | 2.17 | 2.06 | 2.54 | 2.63 | 2.22 | 2.27 | 1.59 | 1.62 | 1.94 | 1.39 | 1.71 |
| TO.6 |      |       |      |      |      |      |       |      |      |      | 2.92 | 2.62  | 5.17 | 2.81  | 0.52  | 3.41 | 1.32 | 1.65 | 3.12 | 1.28 | 4.75 | 1.58 | 3.02 | 2.12 | 3.22 | 1.87 | 3.64 | 1.68 | 3.07 | 1.93 | 3.21 |
| BO.6 |      |       |      |      |      |      |       |      |      |      |      | 1.02  | 1.98 | 1.40  | 1.08  | 1.97 | 2.52 | 2.97 | 1.96 | 1.97 | 1.94 | 1.78 | 3.04 | 2.26 | 1.91 | 2.41 | 1.80 | 2.04 | 1.77 | 1.59 | 2.06 |
| TO.7 |      |       |      |      |      |      |       |      |      |      |      |       | 2.04 | 0.31  | -0.19 | 2.60 | 2.26 | 2.48 | 1.59 | 2.20 | 2.61 | 2.09 | 1.75 | 2.83 | 1.69 | 2.67 | 2.08 | 2.20 | 1.74 | 2.94 | 1.62 |
| BO.7 |      |       |      |      |      |      |       |      |      |      |      |       |      | 1.81  | 0.19  | 2.54 | 2.52 | 2.77 | 2.12 | 2.45 | 2.38 | 2.66 | 2.44 | 2.52 | 1.89 | 2.55 | 1.86 | 2.25 | 2.12 | 2.31 | 1.69 |
| TO.8 |      |       |      |      |      |      |       |      |      |      |      |       |      |       | 1.66  | 2.04 | 2.43 | 1.67 | 1.90 | 1.46 | 2.16 | 1.59 | 1.16 | 2.00 | 1.70 | 1.67 | 2.05 | 1.36 | 1.55 | 1.67 | 2.03 |

**Table S4. RC<sub>bray</sub> of the microbial community.**

[illegible]

**Table S5. Network indexes of each group.**

Numbers in parentheses indicate the correlation threshold.

| <b>Network Indexes</b>                        | <b>TO(0.930)</b> | <b>BO(0.940)</b> | <b>TN(0.940)</b> | <b>BN(0.950)</b> |
|-----------------------------------------------|------------------|------------------|------------------|------------------|
| Total nodes                                   | 772              | 744              | 712              | 554              |
| Total links                                   | 991              | 2203             | 2435             | 917              |
| R square of power-law                         | 0.947            | 0.889            | 0.886            | 0.907            |
| Average degree (avgK)                         | 2.567            | 5.922            | 6.84             | 3.31             |
| Average clustering coefficient (avgCC)        | 0.149            | 0.24             | 0.224            | 0.189            |
| Average path distance (GD)                    | 10.192           | 5.45             | 5.2              | 6.674            |
| Geodesic efficiency (E)                       | 0.133            | 0.241            | 0.243            | 0.192            |
| Harmonic geodesic distance (HD)               | 7.499            | 4.154            | 4.107            | 5.215            |
| Maximal degree                                | 26               | 49               | 66               | 23               |
| Nodes with max degree                         | OTU430           | OTU253           | OTU212           | OTU167           |
| Centralization of degree (CD)                 | 0.03             | 0.058            | 0.083            | 0.036            |
| Maximal betweenness                           | 28707.453        | 11588.358        | 12716.819        | 9945.075         |
| Nodes with max betweenness                    | OTU430           | OTU13220         | OTU221           | OTU687           |
| Centralization of betweenness (CB)            | 0.092            | 0.04             | 0.047            | 0.061            |
| Maximal stress centrality                     | 681975           | 1388380          | 391519           | 186561           |
| Nodes with max stress centrality              | OTU757           | OTU644           | OTU221           | OTU20            |
| Centralization of stress centrality (CS)      | 2.219            | 4.878            | 1.478            | 1.176            |
| Maximal eigenvector centrality                | 0.463            | 0.209            | 0.206            | 0.261            |
| Nodes with max eigenvector centrality         | OTU430           | OTU900           | OTU708           | OTU588           |
| Centralization of eigenvector centrality (CE) | 0.456            | 0.197            | 0.192            | 0.246            |
| Density (D)                                   | 0.003            | 0.008            | 0.01             | 0.006            |
| Reciprocity                                   | 1                | 1                | 1                | 1                |
| Transitivity (Trans)                          | 0.233            | 0.42             | 0.313            | 0.277            |
| Connectedness (Con)                           | 0.383            | 0.369            | 0.514            | 0.428            |
| Efficiency                                    | 0.994            | 0.981            | 0.984            | 0.99             |
| Hierarchy                                     | 0                | 0                | 0                | 0                |
| Lubness                                       | 1                | 1                | 1                | 1                |
| Module                                        | 111              | 124              | 88               | 83               |
| Modularity                                    | 0.879            | 0.508            | 0.495            | 0.752            |



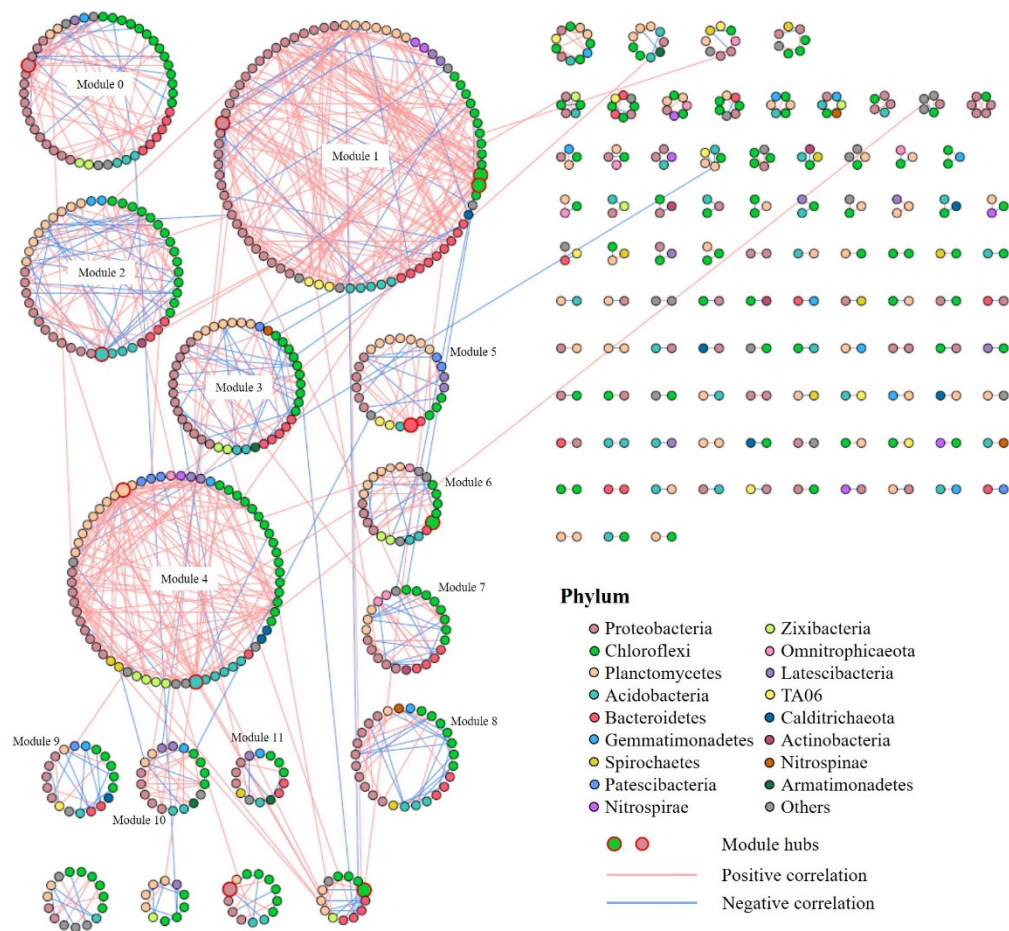

Figure S9. Network of microbial community of TO group.

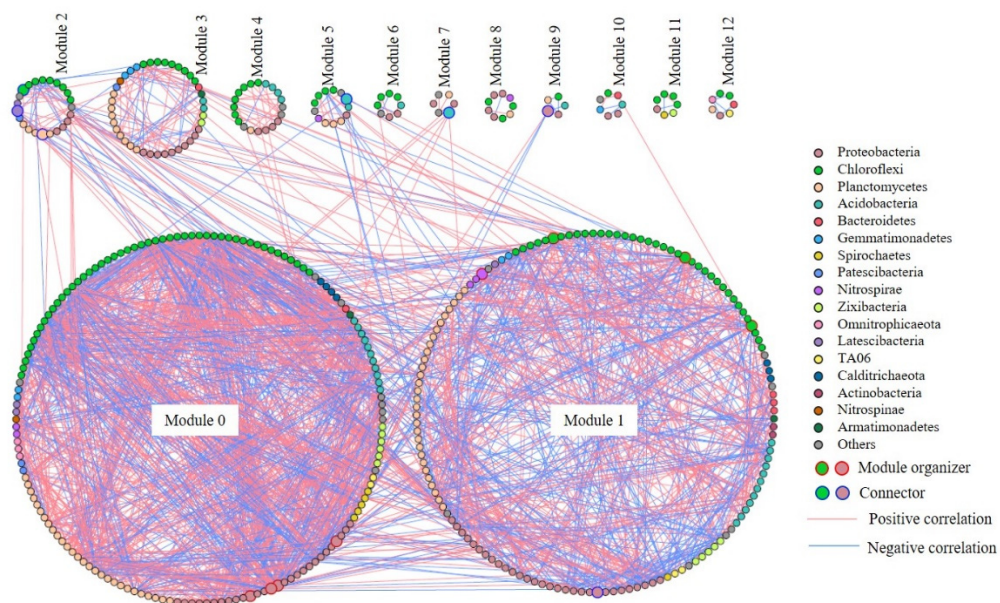

Figure S10. Network of microbial community of BO group.

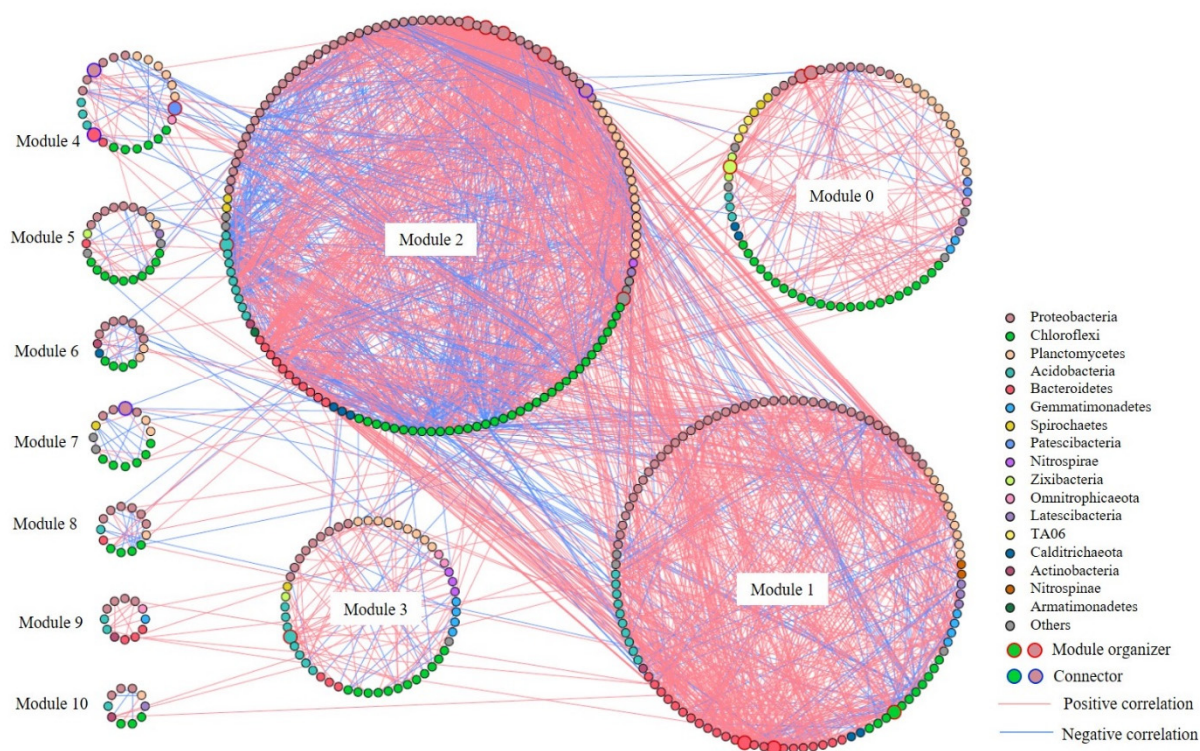

**Figure S11. Network of microbial community of TN group.**

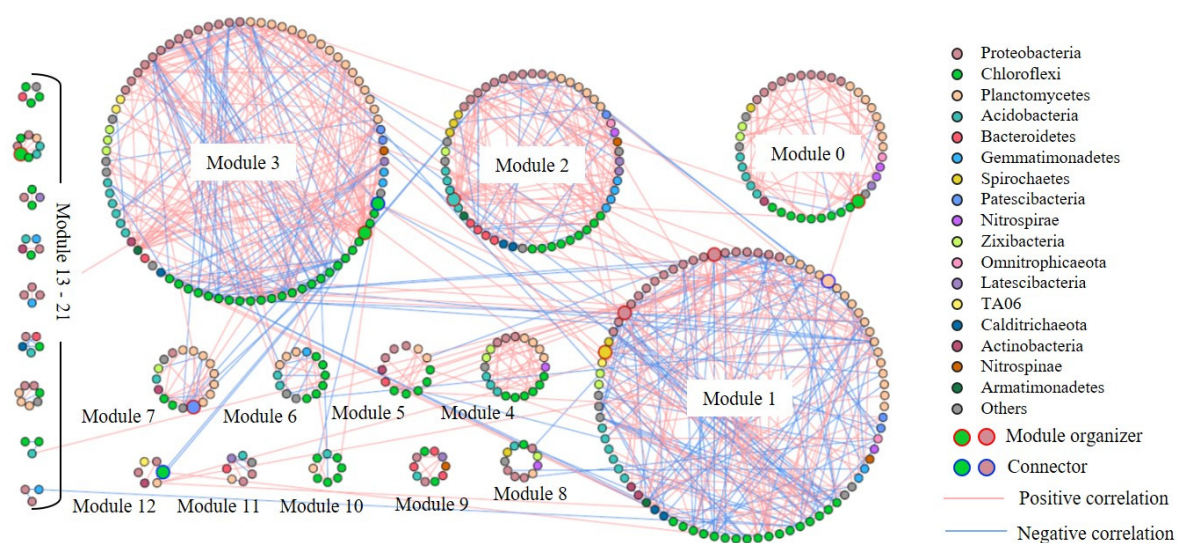

**Figure S12. Network of microbial community of BN group.**



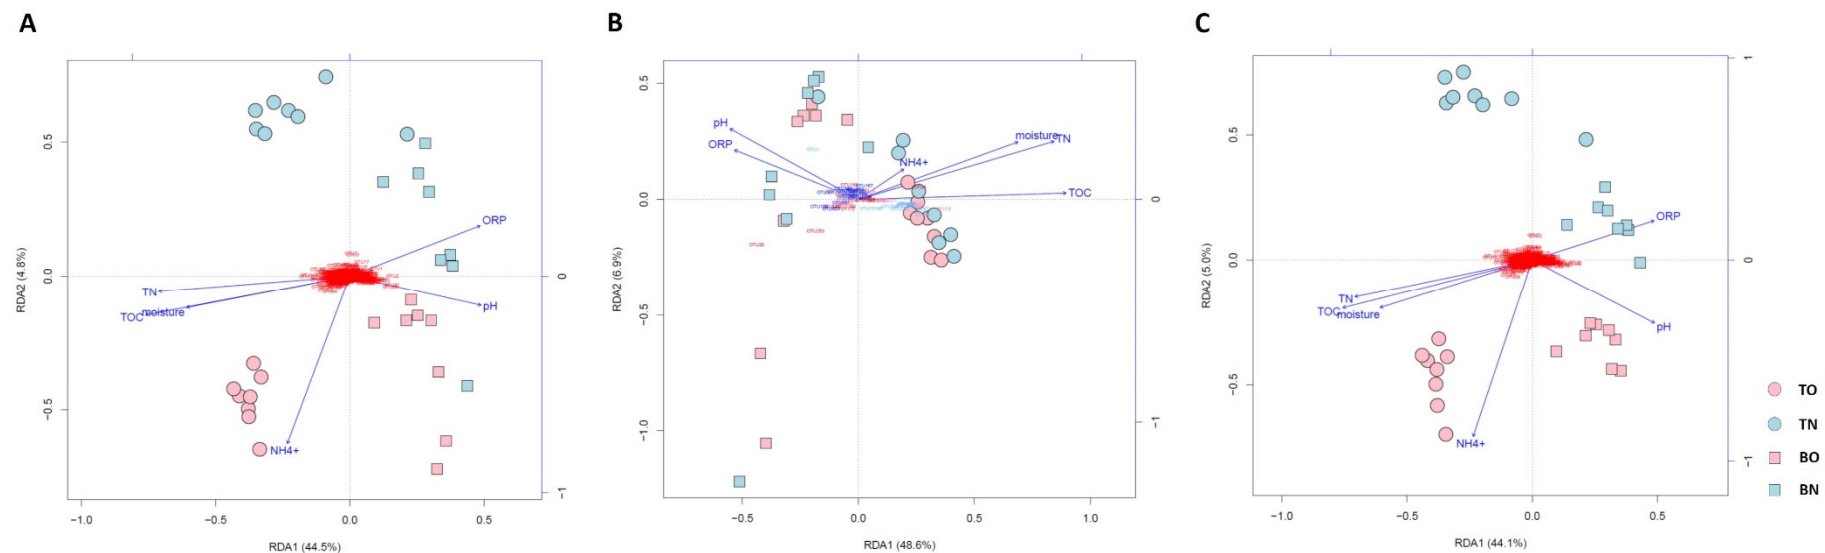

**Figure S13. Redundancy analysis based on different sets of microbes.** (A) The whole community; (B) key species; (C) all without key species. Blue arrows stand for environmental parameters. In (B), key species from different groups are in different colors (pink: TO; red: BO; light blue: TN; dark blue: BN).

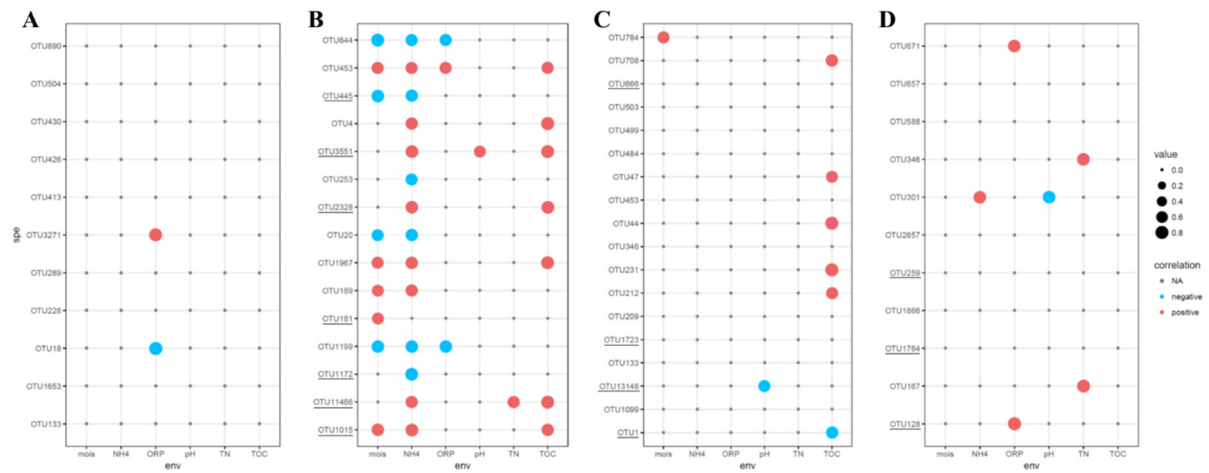

**Figure S14. Relativity of keystone species to environmental parameters.** (A) TO; (B) BO; (C) TN; (D) BN. Relativity of key OTUs from any given group to environmental parameters. Only significant relativities were depicted. Underlined OTUs were connectors (with high  $P_i$  value) and the rest were hubs (with high  $Z_i$  value).

**Table S6. Taxonomy of the keystone species OTUs.**

| ID       | phylum             | class                  | order                 | family                 | genus           |
|----------|--------------------|------------------------|-----------------------|------------------------|-----------------|
| OTU3551  | Acidobacteria      | Aminicenantia          | Aminicenantales       |                        |                 |
| OTU181   | Acidobacteria      | Thermoanaerobaculia    | Thermoanaerobaculales | Thermoanaerobaculaceae | Subgroup_10     |
| OTU2328  | Chloroflexi        | Dehalococcoidia        | GIF3                  |                        |                 |
| OTU1172  | Latescibacteria    |                        |                       |                        |                 |
| OTU1015  | Planctomycetes     | Phycisphaerae          | MSBL9                 | SG8-4                  |                 |
| OTU445   | Proteobacteria     | Deltaproteobacteria    | Sva0485               |                        |                 |
| OTU11466 | Proteobacteria     | Deltaproteobacteria    | Syntrophobacterales   | Syntrophobacteraceae   |                 |
| OTU1967  | Chloroflexi        | Anaerolineae           | Anaerolineales        | Anaerolineaceae        | Pelolinea       |
| OTU4     | Chloroflexi        | Anaerolineae           | Anaerolineales        | Anaerolineaceae        |                 |
| OTU1199  | Chloroflexi        | Dehalococcoidia        | MSBL5                 |                        |                 |
| OTU644   | Nitrospirae        | Thermodesulfovibrionia |                       |                        |                 |
| OTU253   | Proteobacteria     | Deltaproteobacteria    | Desulfarculales       | Desulfarculaceae       | Desulfatiglangs |
| OTU189   | Proteobacteria     | Deltaproteobacteria    | NB1-j                 |                        |                 |
| OTU20    | Proteobacteria     | Deltaproteobacteria    | Sva0485               |                        |                 |
| OTU453   | Proteobacteria     | Deltaproteobacteria    |                       |                        |                 |
| OTU426   | Acidobacteria      | Subgroup_22            |                       |                        |                 |
| OTU504   | Acidobacteria      | Subgroup_22            |                       |                        |                 |
| OTU133   | Chloroflexi        | Anaerolineae           | Anaerolineales        | Anaerolineaceae        |                 |
| OTU1653  | Chloroflexi        | Anaerolineae           | Anaerolineales        | Anaerolineaceae        |                 |
| OTU890   | Chloroflexi        | Anaerolineae           | SBR1031               |                        |                 |
| OTU289   | Chloroflexi        | Dehalococcoidia        | MSBL5                 |                        |                 |
| OTU413   | Proteobacteria     | Alphaproteobacteria    |                       |                        |                 |
| OTU228   | Proteobacteria     | Deltaproteobacteria    | Desulfobacterales     | Desulfobulbaceae       | Desulfobulbus   |
| OTU18    | Proteobacteria     | Gammaproteobacteria    | B2M28                 |                        |                 |
| OTU3271  | Bacteroidetes      | Bacteroidia            | Flavobacteriales      | Flavobacteriaceae      | Robiginitalea   |
| OTU430   | Planctomycetes     | Phycisphaerae          | MSBL9                 | SG8-4                  |                 |
| OTU503   | Acidobacteria      | Subgroup_18            |                       |                        |                 |
| OTU301   | Acidobacteria      | Subgroup_22            |                       |                        |                 |
| OTU484   | Acidobacteria      | Thermoanaerobaculia    | Thermoanaerobaculales | Thermoanaerobaculaceae | Subgroup_10     |
| OTU209   | Bacteroidetes      | Bacteroidia            | Bacteroidales         | Bacteroidetes_BD2-2    |                 |
| OTU499   | Bacteroidetes      | Bacteroidia            | Bacteroidales         | Bacteroidetes_BD2-2    |                 |
| OTU13148 | Bacteroidetes      | Bacteroidia            | Cytophagales          | Cyclobacteriaceae      |                 |
| OTU1866  | Chloroflexi        | Anaerolineae           | ADurb.Bin180          |                        |                 |
| OTU128   | Chloroflexi        | Anaerolineae           | Anaerolineales        | Anaerolineaceae        |                 |
| OTU167   | Chloroflexi        | Anaerolineae           | Anaerolineales        | Anaerolineaceae        |                 |
| OTU259   | Chloroflexi        | Anaerolineae           | Anaerolineales        | Anaerolineaceae        |                 |
| OTU2657  | Chloroflexi        | Anaerolineae           |                       |                        |                 |
| OTU44    | Epsilonbacteraeota | Campylobacteria        | Campylobacteriales    | Sulfurovaceae          | Sulfurovum      |
| OTU346   | Patescibacteria    |                        |                       |                        |                 |
| OTU1764  | Planctomycetes     | Planctomycetacia       | Pirellulales          | Pirellulaceae          |                 |
| OTU657   | Proteobacteria     | Deltaproteobacteria    | Desulfobacterales     | Desulfobacteraceae     | SEEP-SRB1       |
| OTU708   | Proteobacteria     | Deltaproteobacteria    | Desulfobacterales     | Desulfobacteraceae     |                 |
| OTU588   | Proteobacteria     | Deltaproteobacteria    | Myxococcales          | PS-B29                 |                 |
| OTU666   | Proteobacteria     | Deltaproteobacteria    | NB1-j                 |                        |                 |
| OTU1723  | Proteobacteria     | Deltaproteobacteria    | NKB15                 |                        |                 |
| OTU1099  | Proteobacteria     | Deltaproteobacteria    | Sva0485               |                        |                 |
| OTU1     | Proteobacteria     | Deltaproteobacteria    | Syntrophobacterales   | Syntrophobacteraceae   |                 |
| OTU212   | Proteobacteria     | Gammaproteobacteria    | Chromatiales          | Sedimenticolaceae      | Sedimenticola   |
| OTU47    | Proteobacteria     | Gammaproteobacteria    | Chromatiales          | Chromatiaceae          |                 |
| OTU231   | Proteobacteria     | Gammaproteobacteria    | Run-SP154             |                        |                 |
| OTU671   | Spirochaetes       | Spirochaetia           | Spirochaetales        | Spirochaetaceae        |                 |
| OTU784   | Zixibacteria       |                        |                       |                        |                 |

**Table S7.  $\beta$ NTI of the keystone species of the microbial community.**

|      | TO.2  | TO.3 | TO.4 | TO.5 | TO.6 | TO.7 | TO.8  | BO.1  | BO.2  | BO.3  | BO.4  | BO.5  | BO.6  | BO.7  | BO.8  | TN.1  | TN.2  | TN.3  | TN.4  | TN.5  | TN.6  | TN.7  | TN.8  | BN.1 | BN.2  | BN.3 | BN.4  | BN.5  | BN.6  | BN.7  | BN.8  |
|------|-------|------|------|------|------|------|-------|-------|-------|-------|-------|-------|-------|-------|-------|-------|-------|-------|-------|-------|-------|-------|-------|------|-------|------|-------|-------|-------|-------|-------|
| TO.1 | -0.17 | 1.43 | 1.63 | 1.28 | 1.12 | 2.26 | -1.07 | -0.68 | 1.69  | 0.00  | 1.02  | 1.94  | 0.00  | -0.42 | 2.34  | 0.32  | -0.04 | -0.08 | 0.42  | 0.39  | -0.43 | 0.52  | 0.21  | 1.25 | 0.08  | 2.67 | -1.16 | -1.04 | 2.18  | -0.61 | 2.46  |
| TO.2 |       | 1.56 | 0.16 | 0.86 | 0.27 | 1.13 | -0.02 | -0.45 | 1.49  | 0.60  | 0.26  | 0.83  | 0.71  | -0.43 | 2.09  | 0.60  | 0.28  | -0.28 | -0.07 | 0.08  | -0.69 | -0.15 | -0.39 | 1.14 | -0.20 | 2.68 | -1.18 | -1.15 | 2.54  | -0.63 | 2.40  |
| TO.3 |       |      | 2.46 | 2.38 | 2.72 | 0.27 | 1.51  | 0.08  | 2.85  | 0.53  | 2.24  | 2.31  | 2.24  | 0.51  | 3.10  | 2.09  | 1.50  | 0.24  | 0.73  | -0.22 | -0.36 | -0.25 | -0.50 | 1.98 | -0.02 | 2.42 | -1.26 | -1.17 | 2.63  | 1.59  | 3.28  |
| TO.4 |       |      |      | 1.21 | 1.32 | 2.16 | 1.92  | 2.66  | 2.54  | 1.21  | 0.62  | 1.22  | 2.20  | 1.19  | 1.99  | 2.74  | 0.85  | 0.42  | 2.17  | 0.54  | 1.64  | 2.37  | 0.94  | 1.14 | -0.33 | 3.58 | -0.32 | -0.26 | 3.70  | 0.40  | 3.36  |
| TO.5 |       |      |      |      | 1.19 | 2.94 | 0.03  | 0.85  | 1.30  | 1.91  | 1.59  | 1.97  | 2.73  | 0.58  | 1.56  | 3.09  | 1.97  | 0.29  | 2.16  | 0.66  | 2.64  | 3.32  | 2.98  | 1.55 | -0.30 | 2.90 | 0.02  | 0.19  | 3.12  | 0.96  | 2.60  |
| TO.6 |       |      |      |      |      | 2.52 | 1.23  | 1.26  | 2.81  | 1.13  | 0.60  | 1.18  | 2.43  | 0.68  | 1.83  | 2.57  | 1.87  | 0.13  | 2.25  | 0.52  | 2.40  | 3.41  | 2.55  | 1.03 | -0.78 | 3.75 | -0.45 | -0.34 | 3.74  | 0.64  | 3.53  |
| TO.7 |       |      |      |      |      |      | 0.99  | 0.98  | 2.78  | 2.26  | 2.19  | 2.45  | 2.26  | 0.32  | 2.96  | 2.07  | 0.64  | 1.18  | 1.04  | -0.14 | 0.30  | 0.26  | 0.02  | 1.42 | 0.28  | 2.44 | -1.18 | -1.11 | 2.75  | 1.47  | 3.05  |
| TO.8 |       |      |      |      |      |      |       | 0.33  | -0.17 | -1.26 | -0.78 | -1.01 | -1.20 | -1.15 | 0.89  | -1.36 | 0.45  | 0.09  | -0.38 | -0.05 | -0.69 | 0.11  | 0.61  | 0.77 | -1.15 | 2.03 | -0.68 | -1.44 | 0.72  | -1.58 | -0.41 |
| BO.1 |       |      |      |      |      |      |       |       | 1.53  | -0.68 | -0.43 | -0.45 | -0.68 | -0.74 | 0.71  | -0.59 | -0.14 | -0.62 | 0.58  | 0.09  | -0.42 | -0.30 | -0.49 | 0.52 | 0.00  | 2.51 | -0.33 | -1.25 | 1.52  | -0.67 | 0.73  |
| BO.2 |       |      |      |      |      |      |       |       |       | 2.24  | 2.36  | 2.10  | 0.83  | 1.54  | -0.85 | 0.59  | -0.28 | -0.37 | 0.16  | 0.08  | -0.18 | 1.96  | -0.05 | 0.81 | -1.31 | 1.95 | 2.59  | -0.35 | -0.34 | 0.18  | 0.21  |
| BO.3 |       |      |      |      |      |      |       |       |       |       | 0.43  | 1.94  | 0.00  | -0.42 | 1.61  | 0.32  | 0.28  | -0.15 | 0.48  | 0.31  | 0.09  | 0.46  | -0.03 | 0.74 | 0.50  | 0.76 | 1.72  | -0.54 | 1.51  | -0.39 | 0.53  |
| BO.4 |       |      |      |      |      |      |       |       |       |       |       | -0.44 | 1.02  | 1.93  | 2.37  | 1.72  | 0.75  | -0.09 | 0.51  | 0.85  | -0.15 | 2.13  | 1.44  | 1.16 | 1.42  | 2.41 | 1.96  | 1.00  | 2.35  | 1.47  | 1.76  |
| BO.5 |       |      |      |      |      |      |       |       |       |       |       |       | 1.94  | 0.95  | 1.09  | 1.30  | 0.93  | 0.37  | 0.61  | 0.69  | 0.05  | 2.05  | 1.12  | 0.96 | 0.89  | 2.22 | 2.00  | 1.13  | 1.84  | 1.16  | 1.01  |
| BO.6 |       |      |      |      |      |      |       |       |       |       |       |       |       | -0.42 | 0.00  | 0.32  | 0.11  | -0.39 | 0.52  | 0.37  | -0.73 | 1.60  | 0.30  | 0.55 | -0.16 | 2.44 | 2.08  | -0.77 | 0.94  | -0.42 | 1.63  |
| BO.7 |       |      |      |      |      |      |       |       |       |       |       |       |       |       | 1.11  | 0.24  | -0.31 | -0.90 | 0.35  | 0.36  | -0.61 | -0.20 | -0.83 | 0.88 | -0.49 | 2.59 | 0.35  | -1.19 | 1.10  | -0.32 | 1.28  |

**Table S8. RC<sub>bray</sub> of the keystone species of the microbial community.**

|      | TO.2 | TO.3 | TO.4 | TO.5 | TO.6 | TO.7 | TO.8  | BO.1 | BO.2 | BO.3 | BO.4 | BO.5 | BO.6 | BO.7 | BO.8 | TN.1 | TN.2 | TN.3 | TN.4 | TN.5 | TN.6 | TN.7 | TN.8  | BN.1  | BN.2 | BN.3 | BN.4 | BN.5 | BN.6  | BN.7 | BN.8 |      |
|------|------|------|------|------|------|------|-------|------|------|------|------|------|------|------|------|------|------|------|------|------|------|------|-------|-------|------|------|------|------|-------|------|------|------|
| TO.1 | 0.43 | 0.91 | 0.8  | 0.56 | 0.74 | 0.91 | 0.52  | 0.98 | 0.94 | 1    | 0.97 | 0.97 | 1    | 0.98 | 0.92 | 0.97 | 0.91 | 0.71 | 0.86 | 0.91 | 0.78 | 0.34 | -0.11 | 0.9   | 0.94 | 0.88 | 0.87 | 0.91 | 0.96  | 0.96 | 0.93 |      |
| TO.2 |      | 0.83 | 0.32 | 0.5  | 0.59 | 0.67 | 0.71  | 0.9  | 0.98 | 1    | 1    | 1    | 1    | 0.98 | 0.99 | 0.99 | 0.81 | 0.69 | 0.81 | 0.84 | 0.82 | 0.7  | 0.06  | 0.98  | 1    | 0.92 | 0.81 | 0.96 | 0.99  | 1    | 1    |      |
| TO.3 |      |      | 0.58 | 0.76 | 0.74 | 0.9  | 0.67  | 0.86 | 0.91 | 0.99 | 0.94 | 0.96 | 0.97 | 0.97 | 0.98 | 0.9  | 0.81 | 0.75 | 0.81 | 0.81 | 0.72 | 0.28 | 0.1   | 0.97  | 0.83 | 0.8  | 0.79 | 0.8  | 0.9   | 0.86 | 0.89 |      |
| TO.4 |      |      |      | 0.44 | 0.46 | 0.81 | 0.6   | 0.94 | 0.94 | 1    | 0.97 | 0.96 | 1    | 0.96 | 0.95 | 0.97 | 0.79 | 0.65 | 0.73 | 0.79 | 0.75 | 0.55 | 0.03  | 0.92  | 0.95 | 0.86 | 0.79 | 0.91 | 0.92  | 0.95 | 0.94 |      |
| TO.5 |      |      |      |      | 0.66 | 0.83 | -0.33 | 0.83 | 0.96 | 1    | 0.95 | 0.96 | 0.99 | 0.97 | 0.95 | 0.94 | 0.83 | 0.7  | 0.76 | 0.8  | 0.69 | 0.31 | -0.4  | 0.92  | 0.86 | 0.8  | 0.8  | 0.82 | 0.92  | 0.94 | 0.92 |      |
| TO.6 |      |      |      |      |      | 0.76 | 0.66  | 0.94 | 0.99 | 1    | 1    | 1    | 1    | 0.99 | 1    | 0.99 | 0.62 | 0.57 | 0.71 | 0.75 | 0.74 | 0.58 | 0.07  | 1     | 0.99 | 0.92 | 0.79 | 0.94 | 1     | 1    | 0.99 |      |
| TO.7 |      |      |      |      |      |      | 0.88  | 0.95 | 0.99 | 1    | 1    | 1    | 1    | 0.99 | 1    | 1    | 0.87 | 0.79 | 0.86 | 0.88 | 0.87 | 0.75 | 0.33  | 0.99  | 1    | 0.89 | 0.85 | 0.95 | 0.99  | 1    | 1    |      |
| TO.8 |      |      |      |      |      |      |       | 0.89 | 0.94 | 1    | 0.94 | 0.96 | 0.97 | 0.97 | 0.99 | 0.9  | 0.81 | 0.69 | 0.76 | 0.83 | 0.65 | 0.23 | -0.8  | 0.98  | 0.85 | 0.76 | 0.8  | 0.82 | 0.93  | 0.88 | 0.89 |      |
| BO.1 |      |      |      |      |      |      |       |      | 0.88 | 0.97 | 0.94 | 0.94 | 0.96 | 0.96 | 1    | 0.93 | 0.96 | 0.92 | 0.99 | 0.85 | 0.87 | 0.7  | 0.73  | 0.97  | 0.85 | 0.83 | 0.84 | 0.88 | 0.9   | 0.87 | 0.89 |      |
| BO.2 |      |      |      |      |      |      |       |      |      | 0.88 | 0.87 | 0.91 | 0.1  | 0.68 | 1    | 0.68 | 1    | 1    | 1    | 0.87 | 0.88 | 0.75 | 0.84  | 0.96  | 0.8  | 0.8  | 0.92 | 0.86 | 0.58  | 0.77 | 0.9  |      |
| BO.3 |      |      |      |      |      |      |       |      |      |      | 0.94 | 0.97 | 1    | 0.61 | 1    | 0.97 | 1    | 1    | 1    | 0.91 | 0.91 | 0.78 | 0.94  | 0.99  | 0.85 | 0.85 | 0.99 | 0.91 | 0.78  | 0.87 | 0.92 |      |
| BO.4 |      |      |      |      |      |      |       |      |      |      |      | 0.92 | 0.95 | 0.91 | 0.84 | 0.91 | 1    | 1    | 1    | 0.98 | 0.99 | 0.93 | 0.94  | 0.66  | 0.79 | 0.82 | 0.98 | 0.85 | 0.89  | 0.82 | 0.91 |      |
| BO.5 |      |      |      |      |      |      |       |      |      |      |      |      | 0.95 | 0.94 | 0.88 | 0.95 | 1    | 1    | 1    | 0.88 | 0.9  | 0.75 | 0.9   | 0.74  | 0.78 | 0.89 | 0.97 | 0.89 | 0.9   | 0.53 | 0.88 |      |
| BO.6 |      |      |      |      |      |      |       |      |      |      |      |      |      | 0.9  | 0.97 | 0.96 | 1    | 1    | 1    | 0.91 | 0.91 | 0.77 | 0.8   | 0.87  | 0.85 | 0.88 | 0.94 | 0.9  | 0.78  | 0.5  | 0.93 |      |
| BO.7 |      |      |      |      |      |      |       |      |      |      |      |      |      |      | 1    | 0.89 | 1    | 1    | 1    | 0.87 | 0.88 | 0.75 | 0.9   | 1     | 0.81 | 0.86 | 0.96 | 0.86 | 0.84  | 0.8  | 0.9  |      |
| BO.8 |      |      |      |      |      |      |       |      |      |      |      |      |      |      |      | 1    | 1    | 1    | 1    | 1    | 1    | 1    | 0.99  | -0.17 | 0.87 | 0.98 | 0.98 | 0.99 | 1     | 0.79 | 0.85 |      |
| TN.1 |      |      |      |      |      |      |       |      |      |      |      |      |      |      |      |      | 1    | 1    | 1    | 0.89 | 0.91 | 0.74 | 0.73  | 0.97  | 0.81 | 0.86 | 0.83 | 0.86 | 0.53  | 0.78 | 0.92 |      |
| TN.2 |      |      |      |      |      |      |       |      |      |      |      |      |      |      |      |      |      | 0.56 | 0.78 | 0.81 | 0.64 | 0.65 | 0.14  | 1     | 1    | 0.95 | 0.82 | 0.96 | 1     | 1    | 1    |      |
| TN.3 |      |      |      |      |      |      |       |      |      |      |      |      |      |      |      |      |      |      | 0.21 | 0.68 | 0.73 | 0.64 | 0.52  | 1     | 1    | 0.96 | 0.74 | 0.93 | 1     | 1    | 1    |      |
| TN.4 |      |      |      |      |      |      |       |      |      |      |      |      |      |      |      |      |      |      |      | 0.77 | 0.8  | 0.67 | 0.65  | 1     | 1    | 1    | 0.75 | 1    | 1     | 1    | 1    |      |
| TN.5 |      |      |      |      |      |      |       |      |      |      |      |      |      |      |      |      |      |      |      |      | 0.75 | 0.67 | 0.64  | 1     | 0.82 | 0.81 | 0.77 | 0.85 | 0.85  | 0.79 | 0.87 |      |
| TN.6 |      |      |      |      |      |      |       |      |      |      |      |      |      |      |      |      |      |      |      |      |      | 0.58 | 0.49  | 1     | 0.83 | 0.77 | 0.83 | 0.84 | 0.85  | 0.88 | 0.86 |      |
| TN.7 |      |      |      |      |      |      |       |      |      |      |      |      |      |      |      |      |      |      |      |      |      |      |       | 0.47  | 1    | 0.66 | 0.64 | 0.68 | 0.73  | 0.68 | 0.69 | 0.7  |
| TN.8 |      |      |      |      |      |      |       |      |      |      |      |      |      |      |      |      |      |      |      |      |      |      |       |       | 1    | 0.78 | 0.63 | 0.63 | 0.64  | 0.79 | 0.92 | 0.73 |
| BN.1 |      |      |      |      |      |      |       |      |      |      |      |      |      |      |      |      |      |      |      |      |      |      |       |       |      | 0.79 | 0.94 | 0.95 | 0.9   | 0.97 | 0.77 | 0.75 |
| BN.2 |      |      |      |      |      |      |       |      |      |      |      |      |      |      |      |      |      |      |      |      |      |      |       |       |      |      | 0.73 | 0.87 | 0.78  | 0.79 | 0.41 | 0.55 |
| BN.3 |      |      |      |      |      |      |       |      |      |      |      |      |      |      |      |      |      |      |      |      |      |      |       |       |      |      |      | 0.77 | -0.33 | 0.69 | 0.79 | 0.82 |
| BN.4 |      |      |      |      |      |      |       |      |      |      |      |      |      |      |      |      |      |      |      |      |      |      |       |       |      |      |      |      | 0.78  | 0.9  | 0.87 | 0.87 |
| BN.5 |      |      |      |      |      |      |       |      |      |      |      |      |      |      |      |      |      |      |      |      |      |      |       |       |      |      |      |      |       | 0.79 | 0.79 | 0.83 |
| BN.6 |      |      |      |      |      |      |       |      |      |      |      |      |      |      |      |      |      |      |      |      |      |      |       |       |      |      |      |      |       |      | 0.79 | 0.87 |
| BN.7 |      |      |      |      |      |      |       |      |      |      |      |      |      |      |      |      |      |      |      |      |      |      |       |       |      |      |      |      |       |      |      | 0.56 |

**Table S9. Significant correlation of both all and keystone species to environmental factors in each group.**

|                          | <b>Foctors</b>               | <b>TO</b> | <b>BO</b> | <b>TN</b> | <b>BN</b> |
|--------------------------|------------------------------|-----------|-----------|-----------|-----------|
| All species              | Moisture                     | 48        | 222       | 86        | 111       |
|                          | TOC%                         | 50        | 197       | 196       | 68        |
|                          | TN%                          | 36        | 64        | 60        | 127       |
|                          | pH                           | 53        | 62        | 75        | 65        |
|                          | ORP                          | 68        | 110       | 33        | 94        |
|                          | NH <sub>4</sub> <sup>+</sup> | 50        | 249       | 16        | 83        |
|                          | SC                           | 305       | 904       | 466       | 548       |
|                          | SN                           | 1195      | 1195      | 1195      | 1195      |
|                          | Rate                         | 0.2552    | 0.7565    | 0.3900    | 0.4586    |
| Keystone<br>species only | Moisture                     |           | 9         | 1         | 2         |
|                          | TOC%                         |           | 7         | 6         |           |
|                          | TN%                          |           | 1         |           | 2         |
|                          | pH                           |           | 1         |           | 1         |
|                          | ORP                          | 2         | 3         | 1         | 2         |
|                          | NH <sub>4</sub> <sup>+</sup> |           | 14        |           | 1         |
|                          | SC                           | 2         | 35        | 8         | 8         |
|                          | SN                           | 11        | 15        | 18        | 11        |
|                          | Rate                         | 0.1818    | 2.3333    | 0.4444    | 0.7273    |

SC: sum of all significant correlations in a given group.

SN: species number in a group.

Rate: calculated from SC divided by SN.



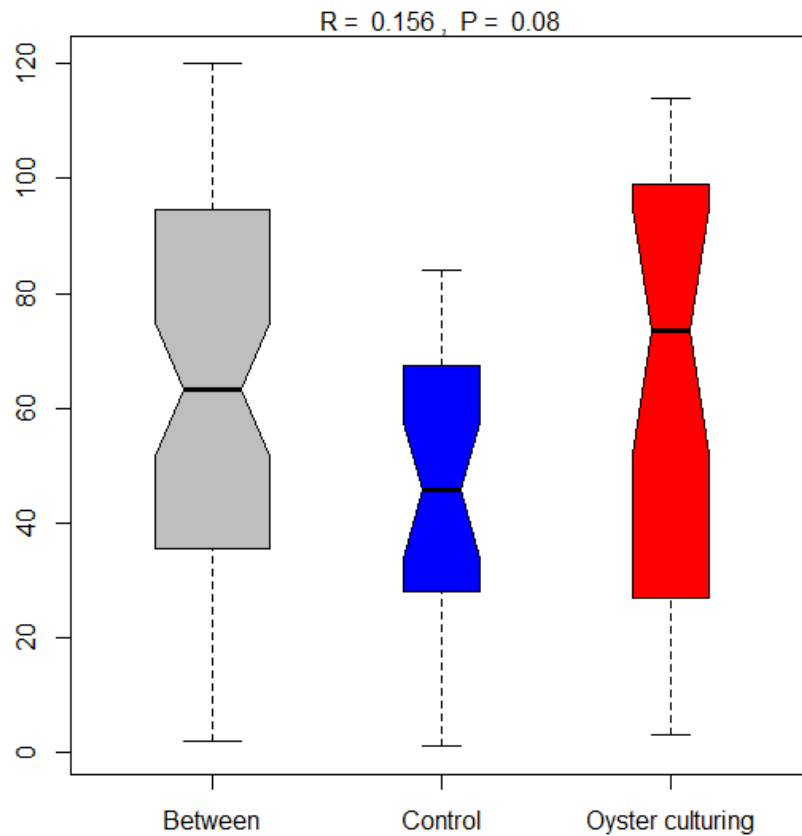

**Figure S15. ANOSIM analysis of water parameters.** Differences between, gray, and within groups (oyster culturing, red; control, blue). (n=8,  $p < 0.05$ . Error bar, mean  $\pm$  s.d.)

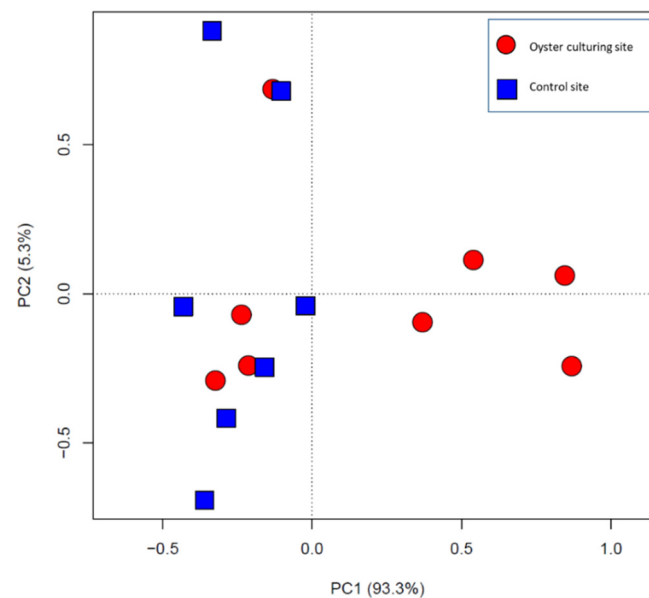

**Figure S16. PCA of water parameters.** Each point is one sample. Environmental parameters are shown as red arrows. Percentages in parentheses are proportions of difference between parameters represented by the PC axis.

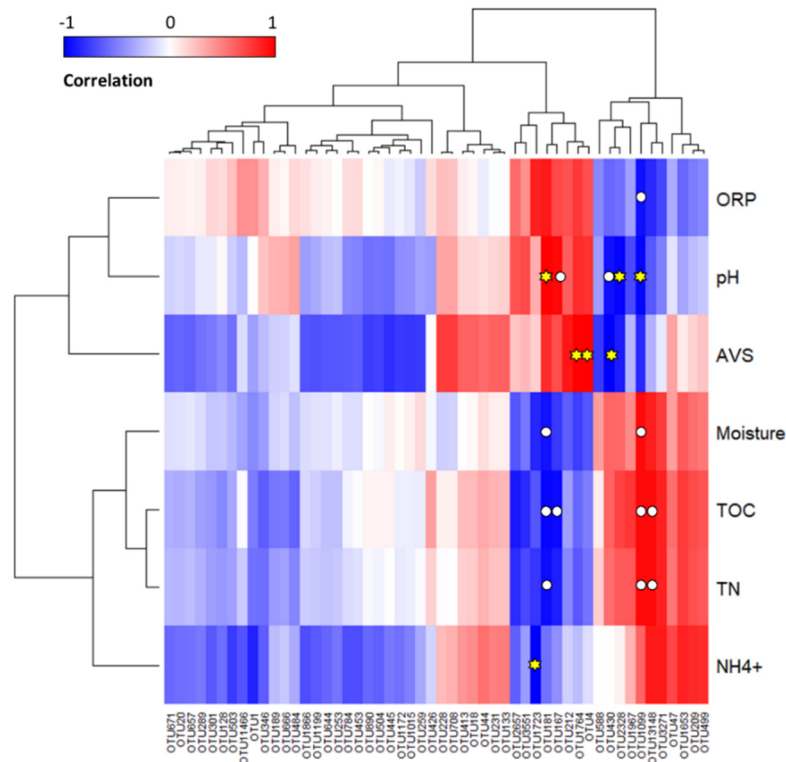

**Figure S17. Correlation and significance of keystone species and environmental parameters.** Red color means the according OTU and parameter are positively related while blue color indicates negative correlation. Each point is one sample. Significant correlations are marked with yellow stars ( $p \leq 0.05$ ,  $n = 4$ ) and white circles ( $p \leq 0.1$ ,  $n = 4$ ).

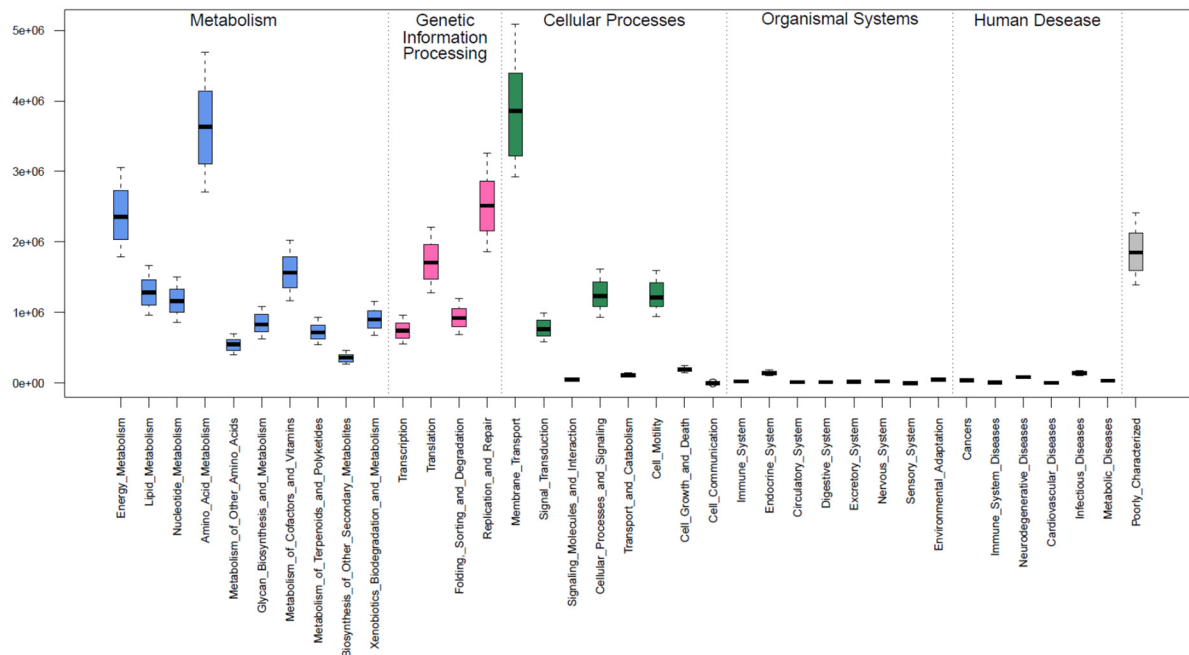

**Figure S18. Genome prediction using PICRUSt based on KEGG database.** Grey box stands for poorly characterized category.

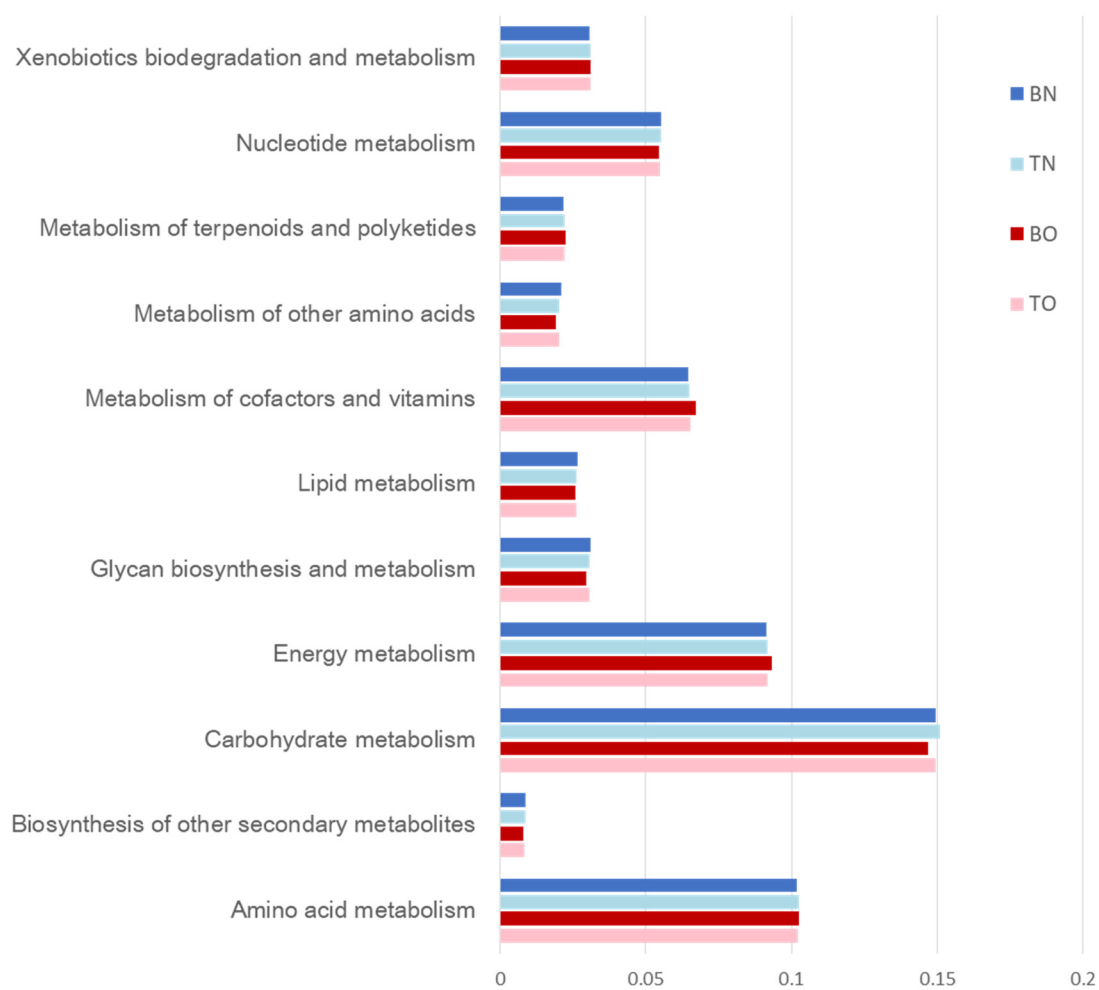

**Figure S19. Metabolism contribution prediction of keystone species.**
